# Supplementary material for: Traditional knowledge of wild edible plants used in Palestine (Northern West Bank): A comparative study
Source: PubMed Central journal article supplement (PMC2396604; doi:10.1186/1746-4269-4-13), 2008-05-12
Supplement: 1746-4269-4-13-S2.pdf [file 1746-4269-4-13-S2.pdf]

Additional file 2. Wild food plants (cited by 1 or 2 informants) traditionally consumed and number of informants that mentioned each food- use in the survey areas.

| Latin name                                   | Arabic common name   | No. of informants | N | Q | J | T | S | Food use category | Part used, way of consumption                 |
|----------------------------------------------|----------------------|-------------------|---|---|---|---|---|-------------------|-----------------------------------------------|
| <b>Apiaceae (Umbeliferae)</b>                |                      |                   |   |   |   |   |   |                   |                                               |
| <i>Ferula communis</i> L.                    | <i>Kalkh</i>         | 2                 |   |   | 2 |   |   | Vegetables        | Inflorescence, eaten cooked                   |
| <b>Brassicaceae (Cruciferae)</b>             |                      |                   |   |   |   |   |   |                   |                                               |
| <i>Capsella bursapastoris</i> (L.) Medik.    | <i>Kees Rai</i>      | 1                 |   | 1 |   |   |   | Vegetables        | Leaves, eaten raw with bread                  |
| <b>Caryophyllaceae</b>                       |                      |                   |   |   |   |   |   |                   |                                               |
| <i>Dianthus strictus</i> Banks & Sol.        | <i>Koronful</i>      | 1                 | 1 |   |   |   |   | Herbal tea        | Inflorescence, as herbal tea                  |
| <b>Cucurbitaceae</b>                         |                      |                   |   |   |   |   |   |                   |                                               |
| <i>Bryonia syriaca</i> Boiss.                | <i>Battikh Barri</i> | 1                 |   | 1 |   |   |   | Fruits            | Fruits, eaten raw                             |
| <b>Dioscoraceae</b>                          |                      |                   |   |   |   |   |   |                   |                                               |
| <i>Tamus communis</i> L. *                   | <i>Jarma'</i>        | 2                 |   | 1 |   |   |   | Vegetables        | Leaves, cooked with onion and tomato          |
| <b>Euphobiaceae</b>                          |                      |                   |   |   |   |   |   |                   |                                               |
| <i>Euphorbia helioscopa</i> L. *             | <i>Lebbaineh</i>     | 2                 | 2 |   |   |   |   | Fruits            | Leaves, eaten raw                             |
| <b>Fabaceae (leguminosae, Papilionaceae)</b> |                      |                   |   |   |   |   |   |                   |                                               |
| <i>Lupinus albus</i> L.                      | <i>Turmos</i>        | 2                 | 2 |   |   |   |   | Fruits            | Seeds, eaten boiled.                          |
| <i>Tetragonolobus purpureus</i> Moench       | <i>Jalthone</i>      | 1                 |   |   |   |   | 1 | Herbal tea        | Leaves, as herbal tea                         |
| <i>Scorpiurus muricatus</i> L.               | <i>Anjadeh</i>       | 1                 |   |   |   |   | 1 | Vegetables        | Leaves, eaten raw                             |
| <i>Calycotome villosa</i> (Poir.) Link       | <i>Qundail</i>       | 1                 | 1 |   |   |   |   | Food decoration   | Inflorescence, added to traditional margarine |
| <b>Fagaceae</b>                              |                      |                   |   |   |   |   |   |                   |                                               |
| <i>Castanea vulgaris</i> (Lam.)              | <i>Castana'</i>      | 1                 |   |   | 1 |   |   | Fruits            | Fruits, roasted                               |
| <b>Geraniaceae</b>                           |                      |                   |   |   |   |   |   |                   |                                               |
| <i>Erodium spp</i>                           | <i>Bukhtrieh</i>     | 2                 |   | 2 |   |   |   | Vegetables        | Leaves, eaten cooked                          |

|                                       |                             |   |   |   |   |  |   |            |                                           |
|---------------------------------------|-----------------------------|---|---|---|---|--|---|------------|-------------------------------------------|
| <b>Lamiaceae (Labiatae)</b>           |                             |   |   |   |   |  |   |            |                                           |
| <i>Calamintha incana</i> (Sm.) Helder | <i>Za'tar Sidi<br/>Musa</i> | 1 | 1 |   |   |  |   | Herbal tea | Leaves, as herbal tea                     |
| <i>Mellisa officinalis</i> L. *       | <i>Mellisa</i>              | 2 |   | 2 |   |  |   | Seasoning  | Leaves, added to tea as a<br>condiment    |
| <b>Malvaceae</b>                      |                             |   |   |   |   |  |   |            |                                           |
| <i>Hibiscus sabdariffa</i> L.         | <i>Karkadaih</i>            | 2 | 2 |   |   |  |   | Herbal tea | Leaves, as herbal tea                     |
| <b>Moraceae</b>                       |                             |   |   |   |   |  |   |            |                                           |
| <i>Ficus sycomorus</i> L.             | <i>Jummaiz</i>              | 2 |   | 1 |   |  |   | Fruits     | Fruits eaten raw                          |
| <b>Orchidaceae</b>                    |                             |   |   |   |   |  |   |            |                                           |
| <i>Orchis mascula</i> ( L.) L.        | <i>Sahlab</i>               | 1 | 1 |   |   |  |   | Seasoning  | Leaves, dried and added to<br>boiled milk |
| <b>Papaveraceae</b>                   |                             |   |   |   |   |  |   |            |                                           |
| <i>Glaucium arabicum</i> Fresen.      | <i>Bakhit</i>               | 1 |   | 1 |   |  |   | Vegetables | Leaves, eaten cooked                      |
| <i>Papaver argemone</i> L.            | <i>Hannoun<br/>Araies</i>   | 1 |   |   |   |  | 1 | Vegetables | Leaves, eaten raw                         |
| <b>Poaceae (Gramineae)</b>            |                             |   |   |   |   |  |   |            |                                           |
| <i>Saccharum ravennae</i> (L.) Murray | <i>Qussaib</i>              | 1 |   |   | 1 |  |   | Herbal tea | Leaves, as herbal tea                     |
| <b>Rhamnaceae</b>                     |                             |   |   |   |   |  |   |            |                                           |
| <i>Rhamnus palaestinus</i> Boiss.     | <i>Suwwaid</i>              | 1 |   | 1 |   |  |   | Fruits     | Fruits, eaten raw                         |
| <b>Rosaceae</b>                       |                             |   |   |   |   |  |   |            |                                           |
| <i>Prunus ursina</i> Kotsch.          | <i>Barqook Barri</i>        | 2 | 1 | 1 |   |  |   | Vegetables | Fruits, eaten raw                         |
| <i>Celtis australis</i> L.            | <i>Mays</i>                 | 1 | 1 |   |   |  |   | Fruits     | Fruits eaten raw                          |
| <b>Zygophyllaceae</b>                 |                             |   |   |   |   |  |   |            |                                           |
| <i>Nitraria schoberi</i> L. *         | <i>Arqad</i>                | 1 |   | 1 |   |  |   | Vegetables | Foliage, eaten cooked                     |

\* Used also as a medicinal plant
